# Supplementary material
Source: PubMed Central journal article supplement (PMC6171274)
Supplement: ASN.2018040344SupplementaryData1.pdf [file ASN.2018040344SupplementaryData1.pdf]

## **SUPPLEMENTARY MATERIALS: TABLE OF CONTENTS**

**Supplementary Appendix 1. ICD9 codes used to define prevalent comorbid conditions prior to the index date**

**Supplementary Appendix 2. Supplementary Methods related to geocoding**

**Appendix Table 1A. Baseline characteristics by race among patients with stage 4 chronic kidney disease: Laboratory values**

**Appendix Table 1B. Baseline characteristics by race among patients with stage 3 chronic kidney disease**

**Appendix Table 2. Unadjusted event rates overall and by race and ethnicity**

**Appendix Table 3. Cox proportional hazards models for time to nephrology referral and visit**

**Appendix Table 4. Cox proportional hazards models for time to nephrology referral and visit, excluding patients who achieved the outcome prior to meeting inclusion criteria**

**Appendix Table 5. Cox proportional hazards models for time to nephrology referral and visit, adjusted for proteinuria, phosphate, intact parathyroid hormone level, and hemoglobin**

**Appendix Table 6. Cox proportional hazards models for time to CKD 5**

**Appendix Table 7. Cox proportional hazards models for time to doubling of creatinine, CKD 5, dialysis, or renal transplantation**

**Appendix Table 8. Cox proportional hazards models for time to CKD 5, dialysis, or renal transplantation**

**Appendix Table 9B. Cox proportional hazards models for time to CKD progression and mortality, adjusted for proteinuria, phosphate, and hemoglobin**

**Appendix Table 10. Cox proportional hazards models for time to death**

**Appendix Table 11. Cox proportional hazards models for time to mortality comparing patients who attended at least one nephrology visit vs. those who did not**

**Appendix Table 12a. Cox proportional hazards models stratified by age category**

**Appendix Table 12b. Cox proportional hazards models stratified by socioeconomic status quartile**

**Appendix Figure S1. Incident chronic kidney disease stage 4 cohort derivation accounting for racial distribution by inclusion and exclusion criteria**

**Appendix Figure S2. Incident chronic kidney disease stage 3 cohort derivation accounting for racial distribution by inclusion and exclusion criteria**

## **SUPPLEMENTARY MATERIALS**

### **Supplementary Appendix 1.**

#### **ICD-9 codes used to define prevalent comorbid conditions prior to the index**

| <b>Comorbid condition</b>       | <b>ICD9 code</b>                              |
|---------------------------------|-----------------------------------------------|
| Hypertension                    | 401-405                                       |
| Diabetes mellitus               | 250.x                                         |
| Coronary artery disease         | 414.x                                         |
| Congestive heart failure        | 428.x                                         |
| Cerebrovascular disease         | 430-438                                       |
| Dementia                        | 290.0-290.42, 291.2, 294.1, 331.19, 331.82    |
| Liver disease                   | 571.x, 572.x, 456.0-456.21                    |
| Chronic lung disease            | 490-496, 500-505, 506.4                       |
| Malignancy                      | 140-172.9, 174-195.8, 200-208.9, 196-199.1    |
| Hemiplegia or paraplegia        | 344.1, 342-342.9                              |
| HIV/AIDS                        | 042-044                                       |
| Depression                      | 296.2, 296.82, 301.12, 311                    |
| Systemic lupus<br>erythematosus | 695.4, 710.0                                  |
| Glomerulonephritis              | 580-583                                       |
| Alcohol abuse/disorder          | 303, 305.0                                    |
| Drug abuse/Drug dependence      | 304, 305(exclude 305.0-305.1)                 |
| Hepatitis C                     | V02.62, V12.09, 070.44, 070.54, 070.70-070.71 |
| Tobacco use                     | 305.1                                         |

## **Supplementary Appendix 2. Supplementary Methods related to geocoding**

We used data from the US Census to identify the latitude and longitude of the centroid of every zip code in the United States.<sup>1</sup> In instances where zip code centroid data was not available through the US Census, we supplemented the data by using additional sources on zip code latitude and longitude as described below. We then merged these data with patient and VA hospital zip code and used STATA VINCENTY package to calculate the distance between the given latitudes and longitudes (i.e. between patient zip code to the VA center). In addition, we used patient zip codes to determine neighborhood socioeconomic status (SES) using the Agency for Health Care Related Quality's SES index.<sup>2</sup> To identify if a zip code is located in a rural area, we used data from the Center for Medicare & Medicaid Services (CMS).<sup>3</sup>

Missing zip code latitude and longitude: Using data from the United States 2010 Census, we were able to estimate the patient home zip code and VA zip code latitude and longitude in about 85% of instances (86.4% for CKD 3 & 84.2% for CKD 4). Certain VA zip codes and patient reported zip codes (including PO Boxes) were not captured through US Census data, and in such instances we used additional comprehensive (including PO Box and military zip codes) zip code latitude and longitude data available on-line (<http://www.sqldbpros.com/2011/11/free-zip-code-city-county-state-csv/>). To validate the accuracy of the additional comprehensive database as compared to the US Census, we estimated the difference between both datasets and found that in 50% of instances the difference was less than 2 miles and the maximum difference in distance was about 12.3 miles.

| <b>Appendix Table 1A. Baseline characteristics by race among patients with stage 4 chronic kidney disease: Laboratory values</b> |                                        |                                        |                                   |                                 |
|----------------------------------------------------------------------------------------------------------------------------------|----------------------------------------|----------------------------------------|-----------------------------------|---------------------------------|
|                                                                                                                                  | <b>Non-Hispanic white<br/>N=39,767</b> | <b>Non-Hispanic black<br/>N=12,747</b> | <b>Hispanic white<br/>N=4,017</b> | <b>Hispanic black<br/>N=236</b> |
| <b>Proteinuria (<math>\geq 300</math> mg/g), n (%)<sup>a</sup></b>                                                               | 13,861 (35%)                           | 6,289 (49%)                            | 2,586 (64%)                       | 170 (72%)                       |
| <b>Median serum phosphate, mg/dl (IQR)<sup>b</sup></b>                                                                           | 3.7 (3.3-4.1)                          | 3.7 (3.2-4.1)                          | 3.9 (3.4-4.4)                     | 3.7 (3.3-4.1)                   |
| <b>Median intact parathyroid hormone level, pg/ml (IQR)<sup>c</sup></b>                                                          | 85 (54-129)                            | 118 (78-179)                           | 94 (62-143)                       | 104 (68-164)                    |
| <b>Median hemoglobin, g/dl (IQR)<sup>d</sup></b>                                                                                 | 11.8 (10.7-13.0)                       | 11.4 (10.3-12.6)                       | 11.7 (10.7-12.9)                  | 11.2 (10.4-12.6)                |

<sup>a</sup> Proteinuria data were calculated using the maximum value in the one year prior to the index date, and were missing in 52% of patients

<sup>b</sup> For each individual patient, the phosphate data were calculated using the mean value available in the one year prior to the index date, and were missing in 61% of patients. The table shows the median value taken from the population of patients.

<sup>c</sup> For each individual patient, PTH data were calculated using the mean value available for that patient in the one year prior to the index date, and were missing in 77% of patients. The table shows the median value taken from the population of patients

<sup>d</sup> For each individual patient, hemoglobin data were calculated using the mean value available for that patient in the one year prior to the index date, and were missing in 19% of patients. The table shows the median value taken from the population of patients.

| <b>Appendix Table 1B. Baseline characteristics by race among patients with stage 3 chronic kidney disease<sup>a</sup></b> |                                     |                                         |                                        |                                    |                                   |
|---------------------------------------------------------------------------------------------------------------------------|-------------------------------------|-----------------------------------------|----------------------------------------|------------------------------------|-----------------------------------|
|                                                                                                                           | <b>Overall cohort<br/>N=640,704</b> | <b>Non-Hispanic white<br/>N=524,357</b> | <b>Non-Hispanic black<br/>N=84,476</b> | <b>Hispanic white<br/>N=30,272</b> | <b>Hispanic black<br/>N=1,599</b> |
| <b>Median age, years (IQR)</b>                                                                                            | 73 (65-80)                          | 74 (66-81)                              | 67 (60-76)                             | 73 (65-81)                         | 75 (66-82)                        |
| <b>Male gender, n (%)</b>                                                                                                 | 619,186                             | 507,242 (97%)                           | 80,667 (95%)                           | 29,710 (98%)                       | 1,567 (98%)                       |
| <b>Median duration of follow up, days (IQR)</b>                                                                           | 2089 (1085-3219)                    | 2130 (1113-3248)                        | 1885 (980-3008)                        | 1997 (1014-3233)                   | 1732 (867-2960)                   |
| <b>Median eGFR at incident stage 3 CKD, ml/min/1.73m<sup>2</sup> (IQR)</b>                                                | 54 (49-57)                          | 54 (49-57)                              | 53 (48-57)                             | 54 (48-57)                         | 53 (48-57)                        |
| <b>Proteinuria (≥300 mg/g), n (%)<sup>b</sup></b>                                                                         | 70,661 (55%)                        | 47,109 (9%)                             | 14,971 (18%)                           | 6,686 (22%)                        | 450 (28%)                         |
| <b>Median serum phosphate, mg/dl (IQR)<sup>c</sup></b>                                                                    | 3.3 (2.9-3.7)                       | 3.3 (2.9-3.7)                           | 3.3 (3.0-3.8)                          | 3.4 (2.9-3.8)                      | 3.2 (2.9-3.8)                     |
| <b>Median intact parathyroid hormone level, pg/ml (IQR)<sup>d</sup></b>                                                   | 52 (33-80)                          | 49 (31-75)                              | 62 (40-93)                             | 53 (31-80)                         | 50 (31-81)                        |
| <b>Median hemoglobin, g/dl (IQR)<sup>e</sup></b>                                                                          | 13.9 (12.7-14.9)                    | 14.0 (13.0-15.0)                        | 13.1 (12.0-14.2)                       | 13.7 (12.5-14.8)                   | 13.0 (11.9-14.2)                  |
| <b>Medical comorbidities, n (%)</b>                                                                                       |                                     |                                         |                                        |                                    |                                   |
| <b>Diabetes</b>                                                                                                           | 315,894                             | 247,738 (47%)                           | 48,438 (57%)                           | 18,760 (62%)                       | 958 (60%)                         |
| <b>Hypertension</b>                                                                                                       | 583,151                             | 472,540 (90%)                           | 80,853 (96%)                           | 28,219 (93%)                       | 1,539 (96%)                       |
| <b>Congestive heart failure</b>                                                                                           | 143,245 (22%)                       | 114,887 (22%)                           | 21,535 (26%)                           | 6,400 (22%)                        | 423 (26%)                         |
| <b>Cerebrovascular disease</b>                                                                                            | 163,052 (25%)                       | 132,826 (25%)                           | 21,495 (25%)                           | 8,251 (27%)                        | 480 (30%)                         |
| <b>Coronary artery disease</b>                                                                                            | 301,499 (47%)                       | 256,858 (49%)                           | 31,051 (37%)                           | 12,987 (43%)                       | 603 (38%)                         |
| <b>SLE</b>                                                                                                                | 1,838 (<1%)                         | 1,251 (<1%)                             | 518 (<1%)                              | 63 (<1%)                           | 6 (<1%)                           |
| <b>Liver disease</b>                                                                                                      | 29,184 (5%)                         | 21,981 (4%)                             | 4,534 (5%)                             | 2,557 (8%)                         | 112 (7%)                          |
| <b>Hepatitis C</b>                                                                                                        | 17,709 (3%)                         | 10,259 (2%)                             | 6,028 (7%)                             | 1,342 (4%)                         | 80 (5%)                           |
| <b>Chronic lung disease</b>                                                                                               | 258,527 (40%)                       | 214,591 (41%)                           | 32,790 (39%)                           | 10,579 (35%)                       | 567 (35%)                         |
| <b>Malignancy</b>                                                                                                         | 18,497 (3%)                         | 14,421 (3%)                             | 3,086 (4%)                             | 911 (3%)                           | 79 (5%)                           |
| <b>HIV</b>                                                                                                                | 3,161 (<1%)                         | 1,490 (<1%)                             | 1,444 (2%)                             | 206 (<1%)                          | 21 (1%)                           |

|                                                      |               |               |               |               |               |
|------------------------------------------------------|---------------|---------------|---------------|---------------|---------------|
| <b>Hemiplegia</b>                                    | 15,717 (2%)   | 10,897 (2%)   | 3,613 (4%)    | 1,131 (4%)    | 76 (5%)       |
| <b>Depression</b>                                    | 204,604       | 162,740 (31%) | 29,449 (35%)  | 11,839 (39%)  | 576 (36%)     |
| <b>Dementia</b>                                      | 25,759 (4%)   | 19,700 (4%)   | 3,403 (4%)    | 2,495 (8%)    | 161 (10%)     |
| <b>Social and behavioral characteristics, n (%)</b>  |               |               |               |               |               |
| <b>Alcohol abuse/disorder</b>                        | 72,461 (11%)  | 51,167 (10%)  | 16,953 (20%)  | 4,087 (14%)   | 254 (16%)     |
| <b>Drug abuse/Drug dependence</b>                    | 27,058 (4%)   | 14,689 (3%)   | 10,854 (13%)  | 1,410 (5%)    | 105 (7%)      |
| <b>Tobacco use</b>                                   | 196,611       | 157,472 (30%) | 31,149 (37%)  | 7,538 (25%)   | 453 (28%)     |
| <b>Married</b>                                       | 377,421       | 320,227 (61%) | 37,803 (45%)  | 18,510 (61%)  | 881 (55%)     |
| <b>Median systolic BP, mmHg (IQR)</b>                | 136 (128-144) | 136 (128-144) | 139 (130-147) | 137 (128-145) | 138 (130-146) |
| <b>Median diastolic BP, mmHg (IQR)</b>               | 75 (70-81)    | 75 (70-80)    | 79 (73-85)    | 75 (70-80)    | 76 (71-82)    |
| <b>Median BMI, kg/m<sup>2</sup> (IQR)</b>            | 29 (26-33)    | 29 (26-33)    | 29 (26-33)    | 28 (26-32)    | 28 (25-31)    |
| <b>Percent Service Connection<sup>e</sup>, n (%)</b> |               |               |               |               |               |
| <b>&lt;10%</b>                                       | 491,123       | 406,874 (77%) | 60,150 (71%)  | 22,876 (76%)  | 1,223 (76%)   |
| <b>10-49%</b>                                        | 92,340        | 72,773 (13%)  | 15,302 (18%)  | 4,030 (13%)   | 235 (15%)     |
| <b>50-99%</b>                                        | 41,661        | 32,921 (6%)   | 6,494 (7%)    | 2,167 (7%)    | 79 (5%)       |
| <b>100%</b>                                          | 15,578        | 11,787 (2%)   | 2,530 (3%)    | 1,199 (4%)    | 62 (4%)       |
| <b>Median distance to VA center, miles (IQR)</b>     | 23 (10-53)    | 25 (11-55)    | 15 (8-44)     | 17 (8-42)     | 12 (6-27)     |
| <b>Live in urban setting, n (%)</b>                  | 477,318 (75%) | 374,976 (72%) | 72,756 (86%)  | 28,048 (93%)  | 1,538 (96%)   |
| <b>Lowest socioeconomic quartile, n (%)</b>          | 139,306 (22%) | 85,153 (17%)  | 35,475 (43%)  | 17,563 (60%)  | 1,115 (72%)   |

Abbreviations: eGFR = estimated glomerular filtration rate. IQR = interquartile range. SLE = systemic lupus erythematosus. HIV = Human immunodeficiency virus. BP = blood pressure. BMI = body mass index

<sup>a</sup> Note that this table is limited to veterans with stage 3 chronic kidney disease who are either white, black, Hispanic white or Hispanic black.

<sup>b</sup> Proteinuria data were calculated using the maximum value in the one year prior to the index date, and were missing in 80% of patients

<sup>c</sup> For each individual patient, phosphate data were calculated using the mean value in the one year prior to the index date, and were missing in 94% of patients. The table shows the median value taken from the population of patients. <sup>c</sup> For each individual patient, iPTH data were calculated using the mean value in the one year prior to the index date, and were missing in 98% of patients. The table shows the median value taken from the population of patients.

<sup>d</sup> For each individual patient, hemoglobin data were calculated using the mean value in the one year prior to the index date, and were missing in 27% of patients. The table shows the median value taken from the population of patients.

<sup>e</sup> Percent service connection denotes the amount to which disability and/or medical illness burden are associated with active military service time, and indicates additional compensation and medical services available from the VA.

| <b>Appendix Table 2. Unadjusted event rates overall and by race and ethnicity</b>                               |                                                                                |                                                           |                                                                                |                                                           |
|-----------------------------------------------------------------------------------------------------------------|--------------------------------------------------------------------------------|-----------------------------------------------------------|--------------------------------------------------------------------------------|-----------------------------------------------------------|
| <b>Nephrology Referral</b>                                                                                      |                                                                                |                                                           |                                                                                |                                                           |
|                                                                                                                 | <b>CKD4 Cohort:<br/>Number within<br/>cohort<br/>achieving<br/>outcome (%)</b> | <b>CKD4 Cohort:<br/>Events per 1,000<br/>person-years</b> | <b>CKD3 Cohort:<br/>Number within<br/>cohort<br/>achieving<br/>outcome (%)</b> | <b>CKD3 Cohort:<br/>Events per 1,000<br/>person-years</b> |
| Overall cohort                                                                                                  | 34873 (60%)                                                                    | 449                                                       | 97058 (15%)                                                                    | 28                                                        |
| Non-Hispanic white                                                                                              | 21740 (55%)                                                                    | 359                                                       | 63444 (12%)                                                                    | 22                                                        |
| Non-Hispanic black                                                                                              | 9523 (74%)                                                                     | 858                                                       | 25581 (30%)                                                                    | 71                                                        |
| Hispanic white                                                                                                  | 2538 (63%)                                                                     | 569                                                       | 5338 (18%)                                                                     | 34                                                        |
| Hispanic black                                                                                                  | 156 (66%)                                                                      | 706                                                       | 375 (23%)                                                                      | 53                                                        |
| <b>Nephrology Visit</b>                                                                                         |                                                                                |                                                           |                                                                                |                                                           |
|                                                                                                                 | <b>CKD4 Cohort:<br/>Number within<br/>cohort<br/>achieving<br/>outcome (%)</b> | <b>CKD4 Cohort:<br/>Events per 1,000<br/>person-years</b> | <b>CKD3 Cohort:<br/>Number within<br/>cohort<br/>achieving<br/>outcome (%)</b> | <b>CKD3 Cohort:<br/>Events per 1,000<br/>person-years</b> |
| Overall cohort                                                                                                  | 32589 (56%)                                                                    | 370                                                       | 84332 (13%)                                                                    | 24                                                        |
| Non-Hispanic white                                                                                              | 19773 (50%)                                                                    | 287                                                       | 53700 (10%)                                                                    | 18                                                        |
| Non-Hispanic black                                                                                              | 9179 (72%)                                                                     | 719                                                       | 23065 (27%)                                                                    | 62                                                        |
| Hispanic white                                                                                                  | 2584 (64%)                                                                     | 562                                                       | 5131 (17%)                                                                     | 33                                                        |
| Hispanic black                                                                                                  | 172 (73%)                                                                      | 897                                                       | 396 (25%)                                                                      | 56                                                        |
| <b>Progression to CKD stage 5</b>                                                                               |                                                                                |                                                           |                                                                                |                                                           |
|                                                                                                                 | <b>CKD4 Cohort:<br/>Number within<br/>cohort<br/>achieving<br/>outcome (%)</b> | <b>CKD4 Cohort:<br/>Events per 1,000<br/>person-years</b> | <b>CKD3 Cohort:<br/>Number within<br/>cohort<br/>achieving<br/>outcome (%)</b> | <b>CKD3 Cohort:<br/>Events per 1,000<br/>person-years</b> |
| Overall cohort                                                                                                  | 11526 (20%)                                                                    | 67                                                        | 10234 (2%)                                                                     | 3                                                         |
| Non-Hispanic white                                                                                              | 5673 (14%)                                                                     | 45                                                        | 5178 (1%)                                                                      | 2                                                         |
| Non-Hispanic black                                                                                              | 4337 (34%)                                                                     | 127                                                       | 3738 (4%)                                                                      | 8                                                         |
| Hispanic white                                                                                                  | 1065 (27%)                                                                     | 97                                                        | 930 (3%)                                                                       | 5                                                         |
| Hispanic black                                                                                                  | 68 (29%)                                                                       | 117                                                       | 56 (4%)                                                                        | 7                                                         |
| <b>Progression to doubling of creatinine, CKD stage 5, dialysis, or renal transplantation composite outcome</b> |                                                                                |                                                           |                                                                                |                                                           |
|                                                                                                                 | <b>CKD4 Cohort:<br/>Number within<br/>cohort<br/>achieving<br/>outcome (%)</b> | <b>CKD4 Cohort:<br/>Events per 1,000<br/>person-years</b> | <b>CKD3 Cohort:<br/>Number within<br/>cohort<br/>achieving<br/>outcome (%)</b> | <b>CKD3 Cohort:<br/>Events per 1,000<br/>person-years</b> |
| Overall Cohort                                                                                                  | 18509 (32%)                                                                    | 123                                                       | 56882 (9%)                                                                     | 15                                                        |
| Non-Hispanic white                                                                                              | 10217 (26%)                                                                    | 94                                                        | 38130 (7%)                                                                     | 12                                                        |
| Non-Hispanic black                                                                                              | 6011 (47%)                                                                     | 208                                                       | 13165 (16%)                                                                    | 31                                                        |
| Hispanic white                                                                                                  | 1631 (41%)                                                                     | 173                                                       | 4105 (14%)                                                                     | 25                                                        |
| Hispanic black                                                                                                  | 100 (42%)                                                                      | 208                                                       | 259 (16%)                                                                      | 33                                                        |



| <b>Mortality</b>   |                                                                                |                                                           |                                                                                |                                                           |
|--------------------|--------------------------------------------------------------------------------|-----------------------------------------------------------|--------------------------------------------------------------------------------|-----------------------------------------------------------|
|                    | <b>CKD4 Cohort:<br/>Number within<br/>cohort<br/>achieving<br/>outcome (%)</b> | <b>CKD4 Cohort:<br/>Events per 1,000<br/>person-years</b> | <b>CKD3 Cohort:<br/>Number within<br/>cohort<br/>achieving<br/>outcome (%)</b> | <b>CKD3 Cohort:<br/>Events per 1,000<br/>person-years</b> |
| Overall cohort     | 32895 (57%)                                                                    | 161                                                       | 188710 (29%)                                                                   | 48                                                        |
| Non-Hispanic white | 23476 (59%)                                                                    | 172                                                       | 153571 (29%)                                                                   | 48                                                        |
| Non-Hispanic black | 6337 (50%)                                                                     | 131                                                       | 22811 (27%)                                                                    | 48                                                        |
| Hispanic white     | 2300 (57%)                                                                     | 163                                                       | 8776 (29%)                                                                     | 49                                                        |
| Hispanic black     | 133 (56%)                                                                      | 165                                                       | 499 (31%)                                                                      | 58                                                        |

**Appendix Table 3. Cox proportional hazards models for time to nephrology referral and visit**

|                                      | Nephrology Referral          |                            | Nephrology Visit             |                            |
|--------------------------------------|------------------------------|----------------------------|------------------------------|----------------------------|
|                                      | Unadjusted CKD3 <sup>a</sup> | Adjusted CKD3 <sup>b</sup> | Unadjusted CKD3 <sup>a</sup> | Adjusted CKD3 <sup>b</sup> |
| Non-Hispanic white                   | -                            | -                          | -                            | -                          |
| Non-Hispanic black                   | 2.97 (2.93-3.02)             | 1.99 (1.96-2.03)           | 3.13 (3.09-3.18)             | 2.13 (2.09-2.17)           |
| Hispanic white                       | 1.54 (1.49-1.58)             | 1.38 (1.33-1.42)           | 1.75 (1.70-1.80)             | 1.57 (1.52-1.62)           |
| Hispanic black                       | 2.24 (2.03-2.48)             | 2.04 (1.83-2.27)           | 2.86 (2.59-3.15)             | 2.59 (2.33-2.87)           |
| Native Hawaiian/<br>Pacific Islander | 1.39 (1.31-1.48)             | 1.99 (1.96-2.03)           | 1.42 (1.33-1.52)             | 1.29 (1.20-1.39)           |
| American Indian/<br>Alaskan Native   | 1.54 (1.43-1.66)             | 1.37 (1.33-1.42)           | 1.57 (1.45-1.70)             | 1.20 (1.09-1.31)           |
| Asian                                | 1.87 (1.73-2.02)             | 2.04 (1.83-2.27)           | 2.03 (1.87-2.20)             | 1.39 (1.23-1.58)           |
|                                      | Unadjusted CKD4 <sup>a</sup> | Adjusted CKD4 <sup>b</sup> | Unadjusted CKD4 <sup>a</sup> | Adjusted CKD4 <sup>b</sup> |
| Non-Hispanic white                   | -                            | -                          | -                            | -                          |
| Non-Hispanic black                   | 1.55 (1.51-1.59)             | 1.32 (1.28-1.36)           | 1.68 (1.64-1.72)             | 1.45 (1.41-1.50)           |
| Hispanic white                       | 1.24 (1.19-1.29)             | 1.18 (1.13-1.24)           | 1.44 (1.38-1.50)             | 1.37 (1.31-1.43)           |
| Hispanic black                       | 1.35 (1.15-1.58)             | 1.30 (1.10-1.53)           | 1.77 (1.53-2.06)             | 1.74 (1.49-2.04)           |
| Native Hawaiian/<br>Pacific Islander | 1.39 (1.26-1.53)             | 1.27 (1.14-1.42)           | 1.44 (1.30-1.59)             | 1.37 (1.22-1.54)           |
| American Indian/<br>Alaskan Native   | 1.35 (1.20-1.52)             | 1.17 (1.02-1.33)           | 1.40 (1.24-1.58)             | 1.19 (1.04-1.36)           |
| Asian                                | 1.37 (1.21-1.56)             | 1.26 (1.07-1.48)           | 1.67 (1.47-1.89)             | 1.45 (1.23-1.72)           |

All results are reported as hazard ratio (95% confidence interval)

<sup>a</sup>Unadjusted; death-censored

<sup>b</sup>Adjusted for Model 1: age, sex, entry eGFR, Median blood pressure, median body mass index, hypertension, diabetes, coronary artery disease, cerebrovascular disease, congestive heart failure, depression, hemiplegia, dementia, liver disease, chronic lung disease, malignancy, alcohol abuse, drug abuse, hepatitis C, smoking status, marital status, service connection, socioeconomic status, distance to VA medical center; clustered by medical center; death-censored

**Appendix Table 4. Cox proportional hazards models for time to nephrology referral and visit, excluding patients who achieved the outcome prior to meeting inclusion criteria**

|                                      | Nephrology Referral             |                               | Nephrology Visit                |                               |
|--------------------------------------|---------------------------------|-------------------------------|---------------------------------|-------------------------------|
|                                      | Unadjusted<br>CKD3 <sup>a</sup> | Adjusted<br>CKD3 <sup>b</sup> | Unadjusted<br>CKD3 <sup>a</sup> | Adjusted<br>CKD3 <sup>b</sup> |
|                                      | <b>N = 627,017</b>              |                               | <b>N = 633,918</b>              |                               |
| Non-Hispanic white                   | -                               | -                             | -                               | -                             |
| Non-Hispanic black                   | 2.83 (2.78-2.88)                | 1.96 (1.92-2.00)              | 3.10 (3.05-3.16)                | 2.15 (2.10-2.19)              |
| Hispanic white                       | 1.58 (1.53-1.63)                | 1.42 (1.38-1.47)              | 1.79 (1.74-1.85)                | 1.62 (1.56-1.67)              |
| Hispanic black                       | 2.20 (2.95-2.48)                | 2.02 (1.78-2.30)              | 2.83 (2.51-3.17)                | 2.61 (2.32-2.95)              |
| Native Hawaiian/<br>Pacific Islander | 1.39 (1.29-1.49)                | 1.25 (1.15-1.35)              | 1.39 (1.28-1.50)                | 1.27 (1.16-1.38)              |
| American Indian/<br>Alaskan Native   | 1.51 (1.39-1.65)                | 1.19 (1.07-1.31)              | 1.56 (1.42-1.71)                | 1.21 (1.09-1.34)              |
| Asian                                | 1.65 (1.50-1.82)                | 1.36 (1.19-1.55)              | 1.68 (1.51-1.86)                | 1.42 (1.24-1.64)              |
|                                      | <b>N = 31,900</b>               |                               | <b>N = 35,482</b>               |                               |
|                                      | Unadjusted<br>CKD4 <sup>a</sup> | Adjusted<br>CKD4 <sup>b</sup> | Unadjusted<br>CKD4 <sup>a</sup> | Adjusted<br>CKD4 <sup>b</sup> |
| Non-Hispanic white                   | -                               | -                             | -                               | -                             |
| Non-Hispanic black                   | 1.61 (1.53-1.70)                | 1.38 (1.30-1.46)              | 1.81 (1.73-1.90)                | 1.59 (1.50-1.67)              |
| Hispanic white                       | 1.59 (1.48-1.72)                | 1.57 (1.45-1.71)              | 1.71 (1.59-1.84)                | 1.65 (1.53-1.79)              |
| Hispanic black                       | 1.51 (1.09-2.10)                | 1.50 (1.05-2.14)              | 2.33 (1.75-3.09)                | 2.61 (1.94-3.51)              |
| Native Hawaiian/<br>Pacific Islander | 1.31 (1.05-1.63)                | 1.14 (0.88-1.47)              | 1.42 (1.16-1.72)                | 1.40 (1.12-1.75)              |
| American Indian/<br>Alaskan Native   | 1.47 (1.15-1.87)                | 1.33 (1.02-1.73)              | 1.40 (1.12-1.76)                | 1.26 (0.98-1.61)              |
| Asian                                | 1.28 (0.97-1.68)                | 1.43 (1.03-1.99)              | 1.83 (1.44-2.33)                | 1.69 (1.24-2.30)              |

All results are reported as hazard ratio (95% confidence interval)

<sup>a</sup>Unadjusted; death-censored

<sup>b</sup>Adjusted for Model 1: age, sex, entry eGFR, Median blood pressure, median body mass index, hypertension diabetes, coronary artery disease, cerebrovascular disease, congestive heart failure, depression, hemiplegia, dementia, liver disease, chronic lung disease, malignancy, alcohol abuse, drug abuse, hepatitis C, smoking status, marital status, service connection, socioeconomic status, distance to VA medical center; clustered by medical center; death-censored

**Appendix Table 5. Cox proportional hazards models for time to nephrology referral and visit, adjusted for proteinuria, phosphate, intact parathyroid hormone level, and hemoglobin**

| <b>Nephrology Referral</b>             |                                        |                                       |                                      |
|----------------------------------------|----------------------------------------|---------------------------------------|--------------------------------------|
|                                        | <b>Unadjusted<br/>CKD3<sup>a</sup></b> | <b>Adjusted<br/>CKD3<sup>b</sup></b>  | <b>Adjusted<br/>CKD3<sup>c</sup></b> |
| Non-Hispanic white                     | -                                      | -                                     | -                                    |
| Non-Hispanic black                     | 2.97 (2.93-3.02)                       | 1.59 (1.54-1.63)                      | 1.34 (1.26-1.42)                     |
| Hispanic white                         | 1.54 (1.49-1.58)                       | 1.19 (1.13-1.24)                      | 1.25 (1.06-1.47)                     |
| Hispanic black                         | 2.24 (2.03-2.48)                       | 1.29 (1.10-1.52)                      | 2.54 (1.58-4.07)                     |
| <b>Nephrology Referral (continued)</b> |                                        |                                       |                                      |
|                                        | <b>Unadjusted<br/>CKD4<sup>a</sup></b> | <b>Adjusted<br/>CKD4<sup>b</sup></b>  | <b>Adjusted<br/>CKD4<sup>c</sup></b> |
| Non-Hispanic white                     | -                                      | -                                     | -                                    |
| Non-Hispanic black                     | 1.55 (1.51-1.59)                       | 1.20 (1.17-1.23)                      | 1.05 (1.00-1.10) <sup>d</sup>        |
| Hispanic white                         | 1.24 (1.19-1.29)                       | 1.05 (1.01-1.09)                      | 1.16 (1.02-1.31) <sup>d</sup>        |
| Hispanic black                         | 1.35 (1.15-1.58)                       | 1.06 (0.93-1.21) <sup>e</sup>         | 1.32 (0.85-2.03) <sup>e</sup>        |
| <b>Nephrology Visit</b>                |                                        |                                       |                                      |
|                                        | <b>Unadjusted<br/>CKD3<sup>a</sup></b> | <b>Adjusted<br/>CKD3<sup>b</sup></b>  | <b>Adjusted<br/>CKD3<sup>c</sup></b> |
| Non-Hispanic white                     | -                                      | -                                     | -                                    |
| Non-Hispanic black                     | 3.13 (3.09-3.18)                       | 1.64 (1.60-1.70)                      | 1.40 (1.32-1.49)                     |
| Hispanic white                         | 1.75 (1.70-1.80)                       | 1.39 (1.33-1.45)                      | 1.17 (0.99-1.39) <sup>e</sup>        |
| Hispanic black                         | 2.86 (2.59-3.15)                       | 1.65 (1.40-1.93)                      | 2.74 (1.78-4.23)                     |
| <b>Nephrology Visit (continued)</b>    |                                        |                                       |                                      |
|                                        | <b>Unadjusted<br/>CKD4<sup>a</sup></b> | <b>Adjusted,<br/>CKD4<sup>b</sup></b> | <b>Adjusted<br/>CKD4<sup>c</sup></b> |
| Non-Hispanic white                     | -                                      | -                                     | -                                    |
| Non-Hispanic black                     | 1.68 (1.64-1.72)                       | 1.26 (1.23-1.30)                      | 1.16 (1.12-1.21)                     |
| Hispanic white                         | 1.44 (1.38-1.50)                       | 1.22 (1.18-1.27)                      | 0.93 (0.79-1.08) <sup>e</sup>        |
| Hispanic black                         | 1.77 (1.53-2.06)                       | 1.34 (1.19-1.52)                      | 1.25 (0.79-1.98) <sup>e</sup>        |

Abbreviations: CKD = chronic kidney disease. All results are reported as hazard ratio (95% confidence interval). All p-values were <0.001.

<sup>a</sup>Unadjusted; death-censored

<sup>b</sup>Adjusted for Model 1: age, sex, entry eGFR, Median blood pressure, median body mass index, hypertension diabetes, coronary artery disease, cerebrovascular disease, congestive heart failure, depression, hemiplegia, dementia, liver disease, chronic lung disease, malignancy, alcohol abuse, drug abuse, hepatitis C, smoking status, marital status, service connection, socioeconomic status, distance to VA medical center, clustered by medical center, using multiple imputation for missing data; death-censored. Also adjusted for proteinuria, restricted to the subgroup of patients with proteinuria values.

<sup>c</sup>Adjusted for Model 1. Also adjusted for phosphate and hemoglobin levels, restricted to the subgroup of patients with these laboratory values

<sup>d</sup>p<0.05

<sup>e</sup>p>0.05

| <b>Appendix Table 6. Cox proportional hazards models for time to CKD 5</b> |                                        |                                      |                                      |                                      |
|----------------------------------------------------------------------------|----------------------------------------|--------------------------------------|--------------------------------------|--------------------------------------|
|                                                                            | <b>Unadjusted<br/>CKD3<sup>a</sup></b> | <b>Adjusted<br/>CKD3<sup>b</sup></b> | <b>Adjusted<br/>CKD3<sup>c</sup></b> | <b>Adjusted<br/>CKD3<sup>d</sup></b> |
| Non-Hispanic white                                                         | -                                      | -                                    | -                                    | -                                    |
| Non-Hispanic black                                                         | 5.09 (4.88-5.31)                       | 2.64 (2.51-2.77)                     | 1.77 (1.68-1.86)                     | 1.12 (1.10-1.13)                     |
| Hispanic white                                                             | 3.26 (3.04-3.50)                       | 2.51 (2.33-2.71)                     | 1.96 (1.82-2.12)                     | 1.01 (0.98-1.03)                     |
| Hispanic black                                                             | 4.22 (3.24-5.49)                       | 3.01 (2.27-3.99)                     | 1.90 (1.44-2.52)                     | 1.19 (1.08-1.30)                     |
| Native Hawaiian/<br>Pacific Islander                                       | 2.22 (1.97-2.64)                       | 1.80 (1.48-2.20)                     | 1.57 (1.29-1.92)                     | 0.91 (0.86-0.96)                     |
| American Indian/<br>Alaskan Native                                         | 3.18 (2.63-3.83)                       | 2.36 (1.93-2.89)                     | 2.01 (1.64-2.46)                     | 1.03 (0.96-1.10)                     |
| Asian                                                                      | 2.97 (2.40-3.67)                       | 2.25 (1.67-3.04)                     | 1.84 (1.37-2.50)                     | 0.73 (0.66-0.81)                     |
|                                                                            | <b>Unadjusted<br/>CKD4<sup>a</sup></b> | <b>Adjusted<br/>CKD4<sup>b</sup></b> | <b>Adjusted<br/>CKD4<sup>c</sup></b> | <b>Adjusted<br/>CKD4<sup>d</sup></b> |
| Non-Hispanic white                                                         | -                                      | -                                    | -                                    | -                                    |
| Non-Hispanic black                                                         | 2.70 (2.60-2.81)                       | 1.86 (1.77-1.95)                     | 1.62 (1.55-1.70)                     | 1.17 (1.13-1.20)                     |
| Hispanic white                                                             | 2.07 (1.93-2.21)                       | 1.77 (1.65-1.90)                     | 1.57 (1.46-1.69)                     | 1.12 (1.07-1.17)                     |
| Hispanic black                                                             | 2.52 (1.99-3.21)                       | 1.87 (1.45-2.41)                     | 1.51 (1.17-1.95)                     | 1.31 (1.11-1.53)                     |
| Native Hawaiian/<br>Pacific Islander                                       | 1.93 (1.63-2.27)                       | 1.72 (1.43-2.07)                     | 1.55 (1.29-1.86)                     | 1.08 (0.96-1.21)                     |
| American Indian/<br>Alaskan Native                                         | 2.33 (1.94-2.79)                       | 1.77 (1.45-2.18)                     | 1.65 (1.34-2.02)                     | 1.13 (0.99-1.30)                     |
| Asian                                                                      | 2.62 (2.19-3.15)                       | 1.97 (1.53-2.53)                     | 1.62 (1.25-2.08)                     | 1.06 (0.89-1.25)                     |

All results are reported as hazard ratio (95% confidence interval) unless otherwise indicated

<sup>a</sup>Unadjusted; death-censored

<sup>b</sup>Adjusted for Model 1: age, sex, entry eGFR, Median blood pressure, median body mass index, hypertension, diabetes, coronary artery disease, cerebrovascular disease, congestive heart failure, depression, hemiplegia, dementia, liver disease, chronic lung disease, malignancy, alcohol abuse, drug abuse, hepatitis C, smoking status, marital status, service connection, socioeconomic status, distance to VA medical center; clustered by medical center; death-censored

<sup>c</sup>Adjusted for Model 1, in addition to adjustment for nephrology appointment; death-censored

<sup>d</sup>Adjusted for Model 1, composite outcome with death

**Appendix Table 7. Cox proportional hazards models for time to doubling of creatinine, CKD 5, dialysis, or renal transplantation**

|                                      | <b>Unadjusted<br/>CKD3<sup>a</sup></b> | <b>Adjusted<br/>CKD3<sup>b</sup></b> | <b>Adjusted<br/>CKD3<sup>c</sup></b> | <b>Adjusted<br/>CKD3<sup>d</sup></b> |
|--------------------------------------|----------------------------------------|--------------------------------------|--------------------------------------|--------------------------------------|
| Non-Hispanic white                   | -                                      | -                                    | -                                    | -                                    |
| Non-Hispanic black                   | 2.43 (2.38-2.48)                       | 1.74 (1.70-1.79)                     | 1.31 (1.28-1.35)                     | 1.18 (1.16-1.20)                     |
| Hispanic white                       | 1.99 (1.92-2.06)                       | 1.76 (1.70-1.83)                     | 1.52 (1.47-1.58)                     | 1.06 (1.03-1.08)                     |
| Hispanic black                       | 2.59 (2.27-2.95)                       | 2.19 (1.91-2.52)                     | 1.56 (1.36-1.79)                     | 1.27 (1.16-1.38)                     |
| Native Hawaiian/<br>Pacific Islander | 1.24 (1.13-1.35)                       | 1.10 (0.99-1.22)                     | 1.03 (0.93-1.15)                     | 0.92 (0.87-0.96)                     |
| American Indian/<br>Alaskan Native   | 1.58 (1.43-1.76)                       | 1.41 (1.26-1.57)                     | 1.31 (1.17-1.47)                     | 1.05 (0.99-1.12)                     |
| Asian                                | 1.28 (1.13-1.45)                       | 1.26 (1.06-1.49)                     | 1.15 (0.97-1.36)                     | 0.76 (0.69-0.84)                     |
|                                      | <b>Unadjusted<br/>CKD4<sup>a</sup></b> | <b>Adjusted<br/>CKD4<sup>b</sup></b> | <b>Adjusted<br/>CKD4<sup>c</sup></b> | <b>Adjusted<br/>CKD4<sup>d</sup></b> |
| Non-Hispanic white                   | -                                      | -                                    | -                                    | -                                    |
| Non-Hispanic black                   | 2.31 (2.23-2.40)                       | 1.70 (1.63-1.77)                     | 1.50 (1.44-1.56)                     | 1.18 (1.15-1.21)                     |
| Hispanic white                       | 1.91 (1.81-2.03)                       | 1.69 (1.58-1.80)                     | 1.52 (1.42-1.62)                     | 1.14 (1.09-1.19)                     |
| Hispanic black                       | 2.36 (1.91-2.92)                       | 1.86 (1.48-2.33)                     | 1.54 (1.23-1.94)                     | 1.35 (1.15-1.59)                     |
| Native Hawaiian/<br>Pacific Islander | 1.74 (1.51-2.02)                       | 1.51 (1.28-1.78)                     | 1.37 (1.16-1.62)                     | 1.08 (0.96-1.21)                     |
| American Indian/<br>Alaskan Native   | 2.01 (1.70-2.39)                       | 1.58 (1.31-1.91)                     | 1.48 (1.23-1.79)                     | 1.16 (1.01-1.33)                     |
| Asian                                | 2.13 (1.79-2.53)                       | 1.72 (1.35-2.17)                     | 1.45 (1.14-1.83)                     | 1.07 (0.90-1.27)                     |

All results are reported as hazard ratio (95% confidence interval) unless otherwise indicated

<sup>a</sup>Unadjusted; death-censored

<sup>b</sup>Adjusted for Model 1: age, sex, entry eGFR, Median blood pressure, median body mass index, hypertension diabetes, coronary artery disease, cerebrovascular disease, congestive heart failure, depression, hemiplegia, dementia, liver disease, chronic lung disease, malignancy, alcohol abuse, drug abuse, hepatitis C, smoking status, marital status, service connection, socioeconomic status, distance to VA medical center; clustered by medical center; death-censored

<sup>c</sup>Adjusted for Model 1, in addition to adjustment for nephrology appointment; death-censored

<sup>d</sup>Adjusted for Model 1, composite outcome with death

**Appendix Table 8. Cox proportional hazards models for time to CKD5, dialysis, or renal transplantation**

|                                      | <b>Unadjusted<br/>CKD3<sup>a</sup></b> | <b>Adjusted<br/>CKD3<sup>b</sup></b> | <b>Adjusted<br/>CKD3<sup>c</sup></b> | <b>Adjusted<br/>CKD3<sup>d</sup></b> |
|--------------------------------------|----------------------------------------|--------------------------------------|--------------------------------------|--------------------------------------|
| Non-Hispanic white                   | -                                      | -                                    | -                                    | -                                    |
| Non-Hispanic black                   | 4.17 (4.02-4.32)                       | 2.33 (2.24-2.43)                     | 1.59 (1.53-1.66)                     | 1.12 (1.11-1.14)                     |
| Hispanic white                       | 2.84 (2.67-3.01)                       | 2.29 (2.15-2.44)                     | 1.84 (1.72-1.97)                     | 1.01 (0.99-1.04)                     |
| Hispanic black                       | 3.54 (2.81-4.47)                       | 2.67 (2.12-3.37)                     | 1.79 (1.40-2.29)                     | 1.19 (1.08-1.30)                     |
| Native Hawaiian/<br>Pacific Islander | 1.91 (1.64-2.22)                       | 1.69 (1.45-1.97)                     | 1.36 (1.14-1.62)                     | 0.91 (0.86-0.96)                     |
| American Indian/<br>Alaskan Native   | 2.49 (2.10-2.96)                       | 1.88 (1.58-2.23)                     | 1.62 (1.34-1.96)                     | 1.02 (0.96-1.10)                     |
| Asian                                | 2.29 (1.88-2.79)                       | 2.25 (1.84-2.74)                     | 1.49 (1.22-1.98)                     | 0.73 (0.66-0.80)                     |
|                                      | <b>Unadjusted<br/>CKD4<sup>a</sup></b> | <b>Adjusted<br/>CKD4<sup>b</sup></b> | <b>Adjusted<br/>CKD4<sup>c</sup></b> | <b>Adjusted<br/>CKD4<sup>d</sup></b> |
| Non-Hispanic white                   | -                                      | -                                    | -                                    | -                                    |
| Non-Hispanic black                   | 2.55 (2.45-2.65)                       | 1.76 (1.69-1.84)                     | 1.54 (1.47-1.61)                     | 1.17 (1.14-1.21)                     |
| Hispanic white                       | 2.00 (1.88-2.13)                       | 1.74 (1.63-1.85)                     | 1.52 (1.42-1.63)                     | 1.13 (1.08-1.18)                     |
| Hispanic black                       | 2.61 (2.09-3.25)                       | 1.83 (1.46-1.95)                     | 1.61 (1.27-2.03)                     | 1.32 (1.13-1.55)                     |
| Native Hawaiian/<br>Pacific Islander | 1.90 (1.63-2.22)                       | 1.67 (1.38-1.99)                     | 1.43 (1.20-1.71)                     | 1.08 (0.96-1.21)                     |
| American Indian/<br>Alaskan Native   | 2.11 (1.76-2.53)                       | 1.66 (1.38-1.99)                     | 1.48 (1.21-1.81)                     | 1.11 (0.97-1.28)                     |
| Asian                                | 2.49 (2.08-2.98)                       | 2.22 (1.86-2.66)                     | 1.47 (1.14-1.89)                     | 1.05 (0.89-1.25)                     |

All results are reported as hazard ratio (95% confidence interval) unless otherwise indicated

<sup>a</sup>Unadjusted; death-censored

<sup>b</sup>Adjusted for Model 1: age, sex, entry eGFR, Median blood pressure, median body mass index, hypertension, diabetes, coronary artery disease, cerebrovascular disease, congestive heart failure, depression, hemiplegia, dementia, liver disease, chronic lung disease, malignancy, alcohol abuse, drug abuse, hepatitis C, smoking status, marital status, service connection, socioeconomic status, distance to VA medical center, using multiple imputation for missing data; clustered by medical center; death-censored

<sup>c</sup>Adjusted for Model 1, in addition to adjustment for nephrology appointment; death-censored

<sup>d</sup>Adjusted for Model 1, composite outcome with death

**Appendix Table 9. Cox proportional hazards models for time to CKD progression and mortality, adjusted for proteinuria, phosphate, and hemoglobin**

| <b>Progression to doubling of creatinine, CKD stage 5, dialysis, or renal transplantation composite outcome</b> |                                    |                                  |                                  |
|-----------------------------------------------------------------------------------------------------------------|------------------------------------|----------------------------------|----------------------------------|
|                                                                                                                 | <b>Unadjusted CKD3<sup>a</sup></b> | <b>Adjusted CKD3<sup>b</sup></b> | <b>Adjusted CKD3<sup>c</sup></b> |
| Non-Hispanic white                                                                                              | -                                  | -                                | -                                |
| Non-Hispanic black                                                                                              | 2.43 (2.38-2.48)                   | 1.44 (1.38-1.50)                 | 1.27 (1.17-1.39)                 |
| Hispanic white                                                                                                  | 1.99 (1.92-2.06)                   | 1.47 (1.39-1.56)                 | 1.25 (0.96-1.63) <sup>e</sup>    |
| Hispanic black                                                                                                  | 2.59 (2.27-2.95)                   | 1.50 (1.23-1.83)                 | 1.29 (0.58-2.88) <sup>e</sup>    |
| <b>Progression to doubling of creatinine, CKD stage 4, dialysis, or renal transplantation composite outcome</b> |                                    |                                  |                                  |
|                                                                                                                 | <b>Unadjusted CKD4<sup>a</sup></b> | <b>Adjusted CKD4<sup>b</sup></b> | <b>Adjusted CKD4<sup>c</sup></b> |
| Non-Hispanic white                                                                                              | -                                  | -                                | -                                |
| Non-Hispanic black                                                                                              | 2.31 (2.23-2.40)                   | 1.48 (1.41-1.56)                 | 1.39 (1.26-1.53)                 |
| Hispanic white                                                                                                  | 1.91 (1.81-2.03)                   | 1.44 (1.34-1.55)                 | 1.59 (1.24-2.05)                 |
| Hispanic black                                                                                                  | 2.36 (1.91-2.92)                   | 1.35 (1.00-1.81) <sup>d</sup>    | 3.54 (0.96-13.07) <sup>e</sup>   |
| <b>Mortality</b>                                                                                                |                                    |                                  |                                  |
|                                                                                                                 | <b>Unadjusted CKD3<sup>a</sup></b> | <b>Adjusted CKD3<sup>b</sup></b> | <b>Adjusted CKD3<sup>c</sup></b> |
| Non-Hispanic white                                                                                              | -                                  | -                                | -                                |
| Non-Hispanic black                                                                                              | 1.01 (0.99-1.02) <sup>e</sup>      | 0.94 (0.91-0.97)                 | 0.81 (0.76-0.86)                 |
| Hispanic white                                                                                                  | 1.02 (0.99-1.04) <sup>e</sup>      | 0.95 (0.90-0.99) <sup>d</sup>    | 0.82 (0.69-0.97) <sup>d</sup>    |
| Hispanic black                                                                                                  | 1.22 (1.11-1.33)                   | 0.95 (0.82-1.12) <sup>e</sup>    | 0.78 (0.44-1.38) <sup>e</sup>    |
|                                                                                                                 | <b>Unadjusted CKD4<sup>a</sup></b> | <b>Adjusted CKD4<sup>b</sup></b> | <b>Adjusted CKD4<sup>c</sup></b> |
| Non-Hispanic white                                                                                              | -                                  | -                                | -                                |
| Non-Hispanic black                                                                                              | 0.78 (0.75-0.80)                   | 0.86 (0.83-0.90)                 | 0.83 (0.77-0.89)                 |
| Hispanic white                                                                                                  | 0.95 (0.91-0.99) <sup>e</sup>      | 1.00 (0.94-1.05) <sup>e</sup>    | 0.84 (0.67-1.07) <sup>e</sup>    |
| Hispanic black                                                                                                  | 0.97 (0.82-1.15) <sup>e</sup>      | 1.08 (0.87-1.33) <sup>e</sup>    | 1.23 (0.55-2.75) <sup>e</sup>    |

Abbreviations: CKD = chronic kidney disease.

All results are reported as hazard ratio (95% confidence interval) unless otherwise indicated. All p-values were <0.001 unless otherwise indicated.

<sup>a</sup>Unadjusted; death-censored

<sup>b</sup>Adjusted for Model 1: age, sex, entry eGFR, Median blood pressure, median body mass index, hypertension diabetes, coronary artery disease, cerebrovascular disease, congestive heart failure, depression, hemiplegia, dementia, liver disease, chronic lung disease, malignancy, alcohol abuse, drug abuse, hepatitis C, smoking status, marital status, service connection, socioeconomic status, distance to VA medical center, clustered by medical center, using multiple imputation for missing data; death-censored. Also adjusted for proteinuria, restricted to the subgroup of patients with proteinuria values.

<sup>c</sup>Adjusted for Model 1. Also adjusted for phosphate and hemoglobin levels, restricted to the subgroup of patients with these laboratory values

<sup>d</sup>p<0.05

<sup>e</sup>p>0.05



**Appendix Table 10. Cox proportional hazards models for time to death**

|                                      | <b>Unadjusted<br/>CKD3<sup>a</sup></b> | <b>Adjusted<br/>CKD3<sup>b</sup></b> | <b>Unadjusted<br/>CKD4<sup>a</sup></b> | <b>Adjusted<br/>CKD4<sup>b</sup></b> |
|--------------------------------------|----------------------------------------|--------------------------------------|----------------------------------------|--------------------------------------|
| Non-Hispanic white                   | -                                      | -                                    | -                                      | -                                    |
| Non-Hispanic black                   | 1.01 (0.99-1.02)                       | 1.03 (1.02-1.05)                     | 0.78 (0.75-0.80)                       | 0.89 (0.86-0.92)                     |
| Hispanic white                       | 1.02 (0.99-1.04)                       | 0.96 (0.94-0.98)                     | 0.95 (0.91-0.99)                       | 0.95 (0.90-0.99)                     |
| Hispanic black                       | 1.22 (1.11-1.33)                       | 1.10 (1.01-1.22)                     | 0.97 (0.82-1.15)                       | 1.02 (0.86-1.23)                     |
| Native Hawaiian/<br>Pacific Islander | 0.85 (0.81-0.89)                       | 0.88 (0.83-0.93)                     | 0.82 (0.73-0.92)                       | 0.90 (0.79-1.03)                     |
| American Indian/<br>Alaskan Native   | 0.91 (0.86-0.97)                       | 0.99 (0.92-1.06)                     | 0.87 (0.76-0.99)                       | 0.95 (0.82-1.11)                     |
| Asian                                | 0.64 (0.59-0.69)                       | 0.67 (0.60-0.75)                     | 0.67 (0.57-0.78)                       | 0.74 (0.61-0.91)                     |

All results are reported as hazard ratio (95% confidence interval)

<sup>a</sup>Unadjusted

<sup>b</sup>Adjusted for Model 1: age, sex, entry eGFR, Median blood pressure, median body mass index, hypertension, diabetes, coronary artery disease, cerebrovascular disease, congestive heart failure, depression, hemiplegia, dementia, liver disease, chronic lung disease, malignancy, alcohol abuse, drug abuse, hepatitis C, smoking status, marital status, service connection, socioeconomic status, distance to VA medical center; clustered by medical center

**Appendix Table 11. Cox proportional hazards models for time to mortality comparing patients who attended at least one nephrology visit vs. those who did not**

|                     | <b>Unadjusted<br/>CKD3<sup>a</sup></b> | <b>Adjusted<br/>CKD3<sup>b</sup></b> | <b>Unadjusted<br/>CKD4<sup>a</sup></b> | <b>Adjusted<br/>CKD4<sup>b</sup></b> |
|---------------------|----------------------------------------|--------------------------------------|----------------------------------------|--------------------------------------|
| No nephrology visit | -                                      | -                                    | -                                      | -                                    |
| Nephrology visit    | 0.88 (0.86-0.89)                       | 0.78 (0.77-0.79)                     | 0.60 (0.59-0.62)                       | 0.68 (0.65-0.69)                     |

All results are reported as hazard ratio (95% confidence interval) unless otherwise indicated

<sup>a</sup>Unadjusted; death-censored

<sup>b</sup>Adjusted for Model 1: race, age, sex, entry eGFR, median blood pressure, median body mass index, hypertension diabetes, coronary artery disease, cerebrovascular disease, congestive heart failure, depression, hemiplegia, dementia, liver disease, chronic lung disease, malignancy, alcohol abuse, drug abuse, hepatitis C, smoking status, marital status, service connection, socioeconomic status, distance to VA medical center; clustered by medical center

**Appendix Table 12a. Cox proportional hazards models stratified by age category (<50 years, 50-64 years, 65-79 years, ≥80 years)\***

| <b>Nephrology Referral</b>                                                                                      |                                            |                                           |                                           |                                         |
|-----------------------------------------------------------------------------------------------------------------|--------------------------------------------|-------------------------------------------|-------------------------------------------|-----------------------------------------|
|                                                                                                                 | <b>Adjusted CKD4,<br/>Age &lt;50 years</b> | <b>Adjusted CKD4,<br/>Age 50-64 years</b> | <b>Adjusted CKD4,<br/>Age 65-79 years</b> | <b>Adjusted CKD4,<br/>Age ≥80 years</b> |
| Non-Hispanic white                                                                                              | -                                          | -                                         | -                                         | -                                       |
| Non-Hispanic black                                                                                              | 1.18 (1.04-1.35)                           | 1.22 (1.17-1.26)                          | 1.32 (1.28-1.36)                          | 1.63 (1.55-1.72)                        |
| Hispanic white                                                                                                  | 1.25 (1.04-1.50)                           | 1.14 (1.07-1.21)                          | 1.14 (1.08-1.20)                          | 1.28 (1.19-1.38)                        |
| Hispanic black                                                                                                  | 1.84 (1.27-2.68)                           | 1.18 (0.96-1.44) <sup>b</sup>             | 1.19 (0.99-1.42) <sup>b</sup>             | 1.49 (1.18-1.89)                        |
| <b>Nephrology Visit</b>                                                                                         |                                            |                                           |                                           |                                         |
|                                                                                                                 | <b>Adjusted CKD4,<br/>Age &lt;50 years</b> | <b>Adjusted CKD4,<br/>Age 50-64 years</b> | <b>Adjusted CKD4,<br/>Age 65-79 years</b> | <b>Adjusted CKD4,<br/>Age ≥80 years</b> |
| Non-Hispanic white                                                                                              | -                                          | -                                         | -                                         | -                                       |
| Non-Hispanic black                                                                                              | 1.25 (1.08-1.44)                           | 1.31 (1.26-1.37)                          | 1.48 (1.43-1.53)                          | 1.79 (1.69-1.89)                        |
| Hispanic white                                                                                                  | 1.26 (0.99-1.60) <sup>b</sup>              | 1.25 (1.17-1.40)                          | 1.36 (1.29-1.43)                          | 1.53 (1.42-1.65)                        |
| Hispanic black                                                                                                  | 2.12 (1.50-3.00)                           | 1.58 (1.31-1.90)                          | 1.57 (1.33-1.85)                          | 2.09 (1.68-2.60)                        |
| <b>Progression to CKD stage 5</b>                                                                               |                                            |                                           |                                           |                                         |
|                                                                                                                 | <b>Adjusted CKD4,<br/>Age &lt;50 years</b> | <b>Adjusted CKD4,<br/>Age 50-64 years</b> | <b>Adjusted CKD4,<br/>Age 65-79 years</b> | <b>Adjusted CKD4,<br/>Age ≥80 years</b> |
| Non-Hispanic white                                                                                              | -                                          | -                                         | -                                         | -                                       |
| Non-Hispanic black                                                                                              | 1.35 (1.03-1.76)                           | 1.78 (1.64-1.92)                          | 1.97 (1.83-2.11)                          | 2.02 (1.77-2.30)                        |
| Hispanic white                                                                                                  | 1.94 (1.19-3.15)                           | 1.76 (1.55-2.00)                          | 1.68 (1.50-1.88)                          | 1.91 (1.61-2.27)                        |
| Hispanic black                                                                                                  | 1.42 (0.19-10.4) <sup>b</sup>              | 1.93 (1.28-2.93)                          | 1.88 (1.18-3.01)                          | 1.65 (0.82-3.35) <sup>b</sup>           |
| <b>Progression to doubling of creatinine, CKD stage 5, dialysis, or renal transplantation composite outcome</b> |                                            |                                           |                                           |                                         |
|                                                                                                                 | <b>Adjusted CKD4,<br/>Age &lt;50 years</b> | <b>Adjusted CKD4,<br/>Age 50-64 years</b> | <b>Adjusted CKD4,<br/>Age 65-79 years</b> | <b>Adjusted CKD4,<br/>Age ≥80 years</b> |
| Non-Hispanic white                                                                                              | -                                          | -                                         | -                                         | -                                       |
| Non-Hispanic black                                                                                              | 1.36 (1.07-1.74)                           | 1.62 (1.51-1.73)                          | 1.75 (1.64-1.86)                          | 1.91 (1.73-2.12)                        |
| Hispanic white                                                                                                  | 1.24 (0.79-1.96) <sup>b</sup>              | 1.68 (1.49-1.88)                          | 1.59 (1.45-1.76)                          | 1.90 (1.66-2.17)                        |
| Hispanic black                                                                                                  | 2.74 (1.08-6.97)                           | 1.61 (1.08-2.41)                          | 1.87 (1.26-2.79)                          | 2.01 (1.24-3.24)                        |
| <b>Mortality</b>                                                                                                |                                            |                                           |                                           |                                         |
|                                                                                                                 | <b>Adjusted CKD4,<br/>Age &lt;50 years</b> | <b>Adjusted CKD4,<br/>Age 50-64 years</b> | <b>Adjusted CKD4,<br/>Age 65-79 years</b> | <b>Adjusted CKD4,<br/>Age ≥80 years</b> |
| Non-Hispanic white                                                                                              | -                                          | -                                         | -                                         | -                                       |
| Non-Hispanic black                                                                                              | 1.00 (0.74-1.36) <sup>b</sup>              | 0.84 (0.78-0.89)                          | 0.87 (0.83-0.91)                          | 0.94 (0.88-0.99)                        |
| Hispanic white                                                                                                  | 0.85 (0.50-1.42) <sup>b</sup>              | 0.91 (0.82-1.02) <sup>b</sup>             | 0.94 (0.87-1.02) <sup>b</sup>             | 0.96 (0.89-1.04) <sup>b</sup>           |
| Hispanic black                                                                                                  | 0.72 (0.17-3.08) <sup>b</sup>              | 0.75 (0.46-1.20) <sup>b</sup>             | 1.12 (0.82-1.52) <sup>b</sup>             | 1.13 (0.86-1.48) <sup>b</sup>           |

Abbreviations: CKD = chronic kidney disease. All results are reported as hazard ratio (95% confidence interval) unless otherwise indicated. All p-values were <0.001 unless otherwise indicated.

\* Older age modified the effect of black race on the outcomes of nephrology referral, nephrology consultation, and progression to CKD5 (p<0.001 for all interaction terms. Effect modification by age was not evident for the mortality outcome (p=0.145).

<sup>a</sup>Adjusted for Model 1: age, sex, entry eGFR, median blood pressure, median body mass index, hypertension diabetes, coronary artery disease, cerebrovascular disease, congestive heart failure, depression, hemiplegia, dementia, liver disease, chronic lung disease, malignancy, alcohol abuse, drug abuse, hepatitis C, smoking status, marital status, service connection, socioeconomic status, distance to VA medical center, clustered by medical center, using multiple imputation for missing data; death-censored

<sup>b</sup>P-value not significant

**Appendix Table 12b. Cox proportional hazards models stratified by socioeconomic status quartile (lowest, lower-middle, upper-middle, and highest socioeconomic status)\***

| <b>Nephrology Referral</b>                                                                                      |                               |                                    |                                    |                               |
|-----------------------------------------------------------------------------------------------------------------|-------------------------------|------------------------------------|------------------------------------|-------------------------------|
|                                                                                                                 | <b>Adjusted CKD4, Lowest</b>  | <b>Adjusted CKD4, Lower-Middle</b> | <b>Adjusted CKD4, Upper-Middle</b> | <b>Adjusted CKD4, Highest</b> |
| Non-Hispanic white                                                                                              | -                             | -                                  | -                                  | -                             |
| Non-Hispanic black                                                                                              | 1.32 (1.25-1.38)              | 1.33 (1.25-1.41)                   | 1.35 (1.26-1.44)                   | 1.30 (1.21-1.39)              |
| Hispanic white                                                                                                  | 1.14 (1.07-1.21)              | 1.25 (1.10-1.41)                   | 1.25 (1.10-1.42)                   | 1.20 (1.06-1.36)              |
| Hispanic black                                                                                                  | 1.31 (1.08-1.59)              | 1.38 (0.80-2.38) <sup>b</sup>      | 1.56 (0.88-2.76) <sup>b</sup>      | 0.73 (0.27-1.95) <sup>b</sup> |
| <b>Nephrology Visit</b>                                                                                         |                               |                                    |                                    |                               |
|                                                                                                                 | <b>Adjusted CKD4, Lowest</b>  | <b>Adjusted CKD4, Lower-Middle</b> | <b>Adjusted CKD4, Upper-Middle</b> | <b>Adjusted CKD4, Highest</b> |
| Non-Hispanic white                                                                                              | -                             | -                                  | -                                  | -                             |
| Non-Hispanic black                                                                                              | 1.47 (1.40-1.55)              | 1.51 (1.42-1.60)                   | 1.48 (1.38-1.59)                   | 1.38 (1.29-1.47)              |
| Hispanic white                                                                                                  | 1.41 (1.32-1.51)              | 1.36 (1.20-1.54)                   | 1.37 (1.20-1.56)                   | 1.22 (1.07-1.38)              |
| Hispanic black                                                                                                  | 1.82 (1.51-2.18)              | 2.01 (1.21-3.35)                   | 1.88 (1.06-3.32)                   | 1.04 (0.43-2.50) <sup>b</sup> |
| <b>Progression to CKD stage 5</b>                                                                               |                               |                                    |                                    |                               |
|                                                                                                                 | <b>Adjusted CKD4, Lowest</b>  | <b>Adjusted CKD4, Lower-Middle</b> | <b>Adjusted CKD4, Upper-Middle</b> | <b>Adjusted CKD4, Highest</b> |
| Non-Hispanic white                                                                                              | -                             | -                                  | -                                  | -                             |
| Non-Hispanic black                                                                                              | 1.86 (1.71-2.04)              | 1.81 (1.63-2.01)                   | 2.01 (1.79-2.25)                   | 1.75 (1.56-1.96)              |
| Hispanic white                                                                                                  | 1.81 (1.62-2.02)              | 1.74 (1.41-2.15)                   | 1.82 (1.46-2.26)                   | 1.68 (1.38-2.04)              |
| Hispanic black                                                                                                  | 2.01 (1.45-2.79)              | 1.81 (0.61-5.39) <sup>b</sup>      | 1.53 (0.42-5.56) <sup>b</sup>      | 1.94 (0.86-4.38) <sup>b</sup> |
| <b>Progression to doubling of creatinine, CKD stage 5, dialysis, or renal transplantation composite outcome</b> |                               |                                    |                                    |                               |
|                                                                                                                 | <b>Adjusted CKD4, Lowest</b>  | <b>Adjusted CKD4, Lower-Middle</b> | <b>Adjusted CKD4, Upper-Middle</b> | <b>Adjusted CKD4, Highest</b> |
| Non-Hispanic white                                                                                              | -                             | -                                  | -                                  | -                             |
| Non-Hispanic black                                                                                              | 1.73 (1.61-1.87)              | 1.66 (1.52-1.82)                   | 1.78 (1.62-1.97)                   | 1.59 (1.44-1.75)              |
| Hispanic white                                                                                                  | 1.70 (1.54-1.87)              | 1.78 (1.49-2.13)                   | 1.79 (1.48-2.15)                   | 1.54 (1.30-1.83)              |
| Hispanic black                                                                                                  | 1.87 (1.43-2.44)              | 2.47 (1.06-5.74)                   | 2.02 (0.66-6.14) <sup>b</sup>      | 1.39 (0.65-2.96) <sup>b</sup> |
| <b>Mortality</b>                                                                                                |                               |                                    |                                    |                               |
|                                                                                                                 | <b>Adjusted CKD4, Lowest</b>  | <b>Adjusted CKD4, Lower-Middle</b> | <b>Adjusted CKD4, Upper-Middle</b> | <b>Adjusted CKD4, Highest</b> |
| Non-Hispanic white                                                                                              | -                             | -                                  | -                                  | -                             |
| Non-Hispanic black                                                                                              | 0.88 (0.84-0.98)              | 0.86 (0.80-0.92)                   | 0.83 (0.76-0.89)                   | 0.89 (0.82-0.97)              |
| Hispanic white                                                                                                  | 0.93 (0.87-0.99)              | 0.81 (0.70-0.94)                   | 0.96 (0.83-1.12) <sup>b</sup>      | 0.84 (0.73-0.98)              |
| Hispanic black                                                                                                  | 1.01 (0.81-1.25) <sup>b</sup> | 0.72 (0.38-1.35) <sup>b</sup>      | 0.86 (0.41-1.84) <sup>b</sup>      | 1.05 (0.44-2.51) <sup>b</sup> |

Abbreviations: CKD = chronic kidney disease. All results are reported as hazard ratio (95% confidence interval) unless otherwise indicated. All p-values were <0.001 unless otherwise indicated.

\* We did not find effect modification between socio-economic status quartiles and race (nephrology referral p=0.898; nephrology consultation p=0.694; progression to CKD 5 p=0.185; mortality p=0.825).

<sup>a</sup>Adjusted for Model 1: age, sex, entry eGFR, median blood pressure, median body mass index, hypertension diabetes, coronary artery disease, cerebrovascular disease, congestive heart failure, depression, hemiplegia, dementia, liver disease, chronic lung disease, malignancy, alcohol abuse, drug abuse, hepatitis C, smoking status, marital status, service connection, socioeconomic status, distance to VA medical center, clustered by medical center, using multiple imputation for missing data; death-censored

<sup>b</sup>P-value not significant

**Figure S1.** Incident chronic kidney disease stage 4 cohort derivation accounting for racial distribution by inclusion and exclusion criteria

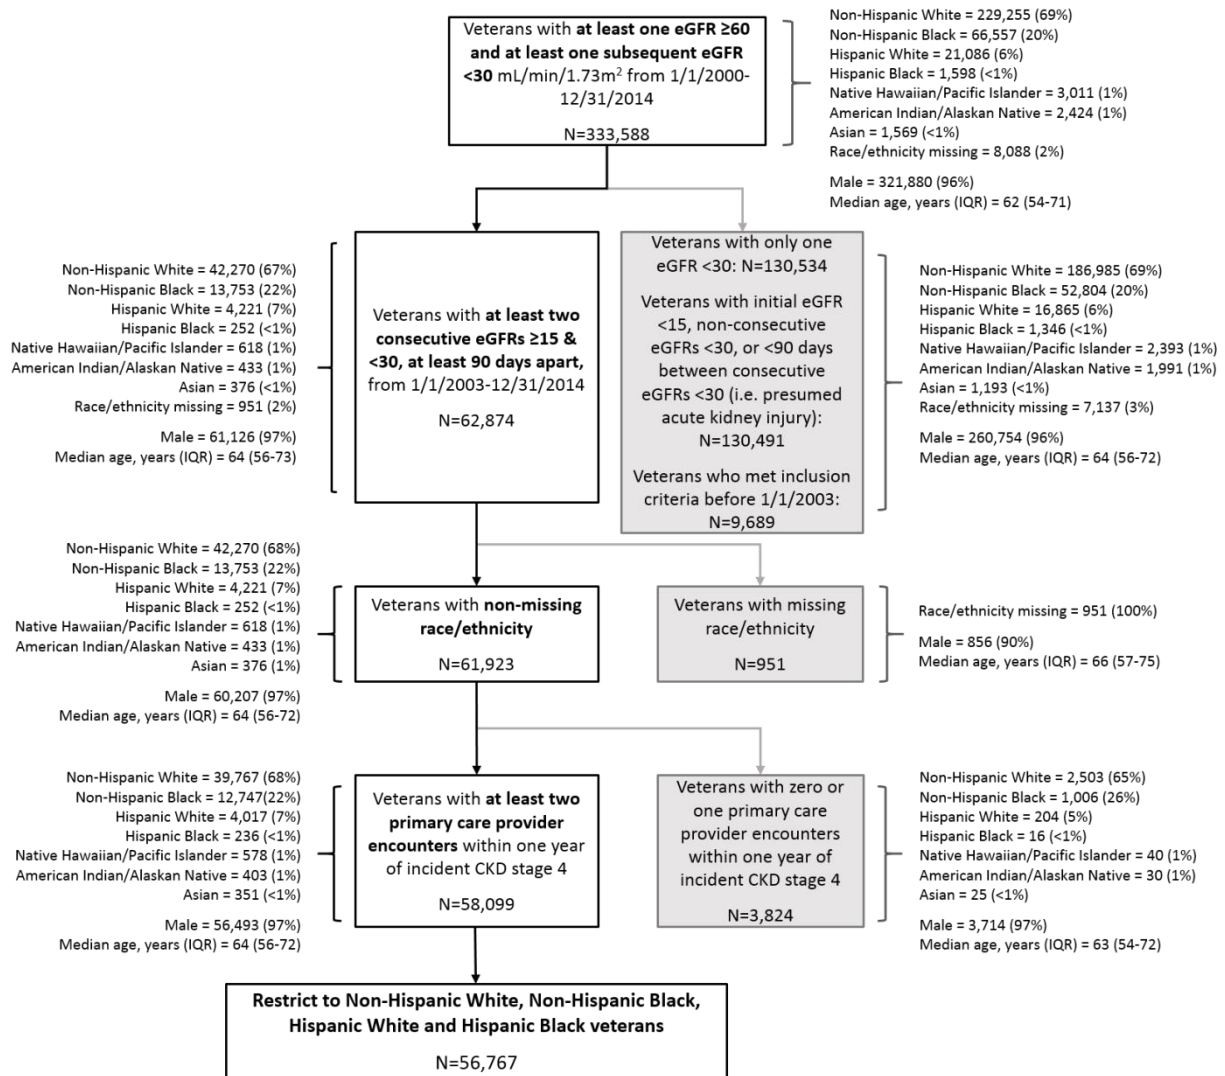

**Figure S2.** Incident chronic kidney disease stage 3 cohort derivation accounting for racial distribution by inclusion and exclusion criteria

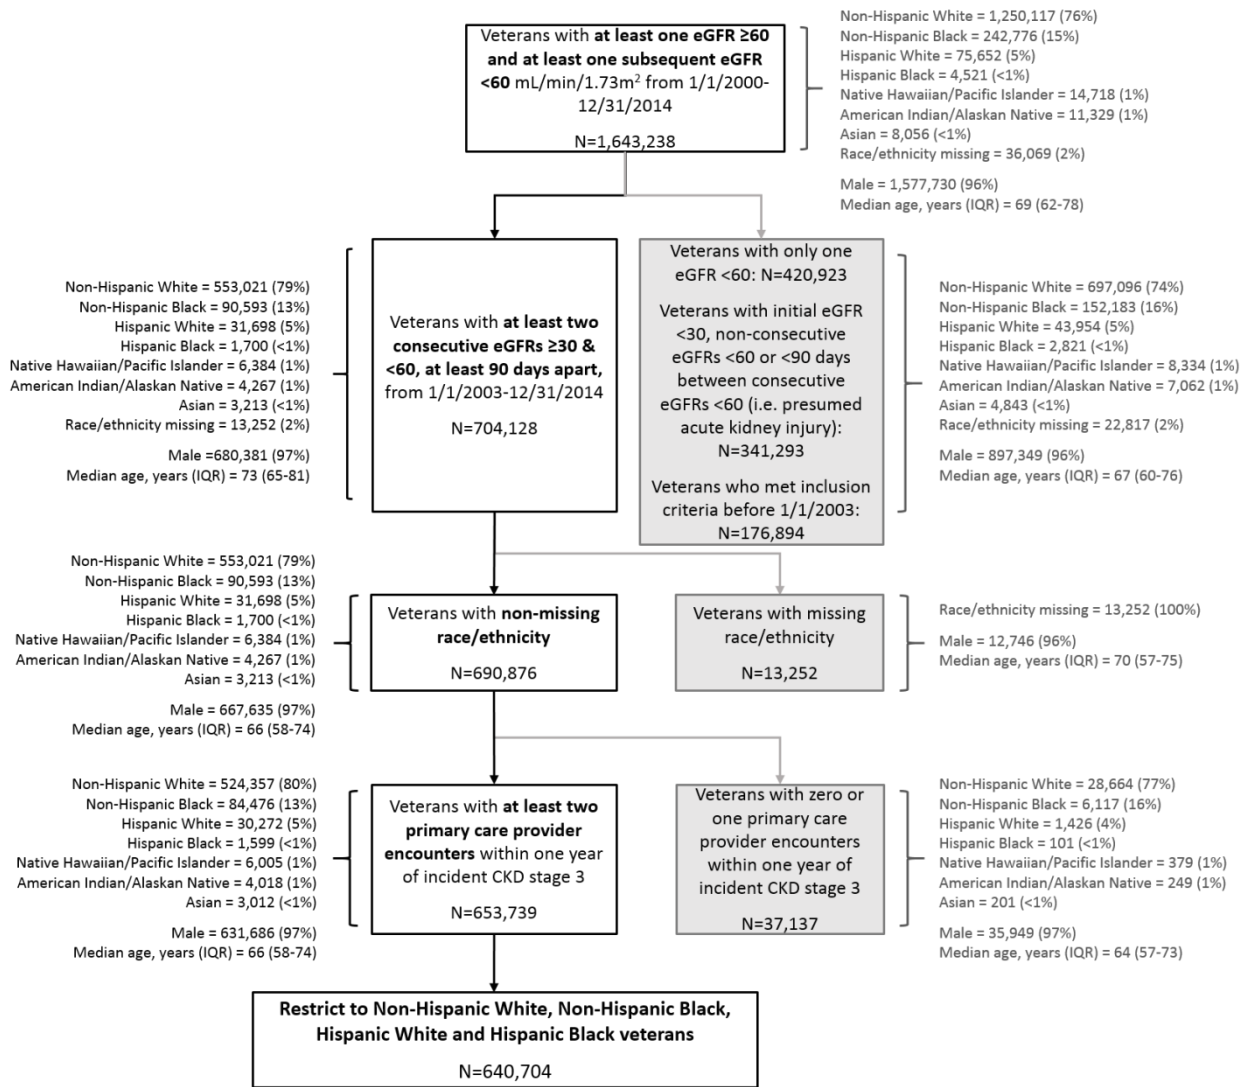

## **REFERENCES**

1. US Census Bureau. 2010 Census Gazetteer Files. <https://www.census.gov/geo/maps-data/data/gazetteer2010.html>. Accessed on: December 20, 2017.
2. Agency for Healthcare Research and Quality. Chapter 3: Creation of New Race-Ethnicity Codes and SES Indicators for Medicare Beneficiaries - Chapter 3. January 2008. Rockville, MD. <http://archive.ahrq.gov/research/findings/final-reports/medicareindicators/medicareindicators3.html>. Accessed on: June 14, 2017.
3. Centers for Medicare & Medicaid Services. Q4 2015 DMEPOS Rural Zip Codes and Revised CY 2016 Fee Schedule PUF Formats. 2016; <https://www.cms.gov/Medicare/Medicare-Fee-for-Service-Payment/DMEPOSFeeSched/DMEPOS-Fee-Schedule-Items/DME-Rural-Zip-and-Formats.html>. Accessed on: June 13, 2017.
